# Supplementary material
Source: ML conference proceedings conference paper supplement (https://proceedings.neurips.cc/paper_files/paper/2021/hash/db9ad56c71619aeed9723314d1456037-Abstract.html)
Supplement: Supplementary file 1 [file db9ad56c71619aeed9723314d1456037-Supplemental.zip]

Archive with 30 entries (24 files):
- Supplementary Material/
- Supplementary Material/appendix.pdf
- Supplementary Material/codes/
- Supplementary Material/codes/cifar10_alpha.py
- Supplementary Material/codes/data/
- Supplementary Material/codes/data/o31_feature/
- Supplementary Material/codes/data/o31_feature/feature_a.npy
- Supplementary Material/codes/data/o31_feature/feature_a_4096.npy
- Supplementary Material/codes/data/o31_feature/feature_a_nr.npy
- Supplementary Material/codes/data/o31_feature/feature_a_sd.npy
- Supplementary Material/codes/data/o31_feature/feature_d.npy
- Supplementary Material/codes/data/o31_feature/feature_d_4096.npy
- Supplementary Material/codes/data/o31_feature/feature_d_nr.npy
- Supplementary Material/codes/data/o31_feature/feature_d_sd.npy
- Supplementary Material/codes/data/o31_feature/feature_w.npy
- Supplementary Material/codes/data/o31_feature/feature_w_4096.npy
- Supplementary Material/codes/data/o31_feature/feature_w_nr.npy
- Supplementary Material/codes/data/o31_feature/feature_w_sd.npy
- Supplementary Material/codes/data/o31_feature/label_a.npy
- Supplementary Material/codes/data/o31_feature/label_d.npy
- Supplementary Material/codes/data/o31_feature/label_w.npy
- Supplementary Material/codes/data/oc_feature/
- Supplementary Material/codes/data/oc_feature/decaf/
- Supplementary Material/codes/data/oc_feature/decaf/amazon_decaf.mat
- Supplementary Material/codes/data/oc_feature/decaf/caltech_decaf.mat
- Supplementary Material/codes/data/oc_feature/decaf/dslr_decaf.mat
- Supplementary Material/codes/data/oc_feature/decaf/webcam_decaf.mat
- Supplementary Material/codes/o31_atod_renew.py
- Supplementary Material/codes/oc_atoc.py
- Supplementary Material/codes/README.md
